# Supplementary material for: Comparative Study of the Co-Occurring Alternaria and Colletotrichum Species in the Production of Citrus Leaf Spot
Source: MDPI journal article supplement (doi:10.3390/jof9111089), 2023-11-08
Supplement: s1 [file s1]

Table S1. The information of transcriptional sequencing of Gonggan leaves.

| Sample name | Inoculant           | Time point (h) | Total reads | GC content | Q30 ratio | Mapped reads        | Uniq mapped reads   | Multiple mapped reads | Reads mapped to '+' | Reads mapped to '-' |
|-------------|---------------------|----------------|-------------|------------|-----------|---------------------|---------------------|-----------------------|---------------------|---------------------|
| A1          | PDA disc            | 48             | 51,543,282  | 44.10%     | 95.03%    | 47,258,195 (91.69%) | 45,921,877 (89.09%) | 1,336,318 (2.59%)     | 24,452,646 (47.44%) | 24,449,633 (47.44%) |
| A2          | PDA disc            | 48             | 51,026,572  | 44.05%     | 95.12%    | 47,948,208 (93.97%) | 46,601,424 (91.33%) | 1,346,784 (2.64%)     | 24,821,291 (48.64%) | 24,807,686 (48.62%) |
| A3          | PDA disc            | 48             | 48,591,390  | 44.17%     | 95.28%    | 45,451,685 (93.54%) | 44,160,862 (90.88%) | 1,290,823 (2.66%)     | 23,535,957 (48.44%) | 23,533,756 (48.43%) |
| A4          | PDA disc            | 48             | 50,739,488  | 44.10%     | 95.42%    | 47,661,474 (93.93%) | 46,260,448 (91.17%) | 1,401,026 (2.76%)     | 24,701,873 (48.68%) | 24,692,819 (48.67%) |
| A5          | Colletotrichum F12C | 48             | 50,236,564  | 44.25%     | 95.35%    | 47,218,368 (93.99%) | 45,653,376 (90.88%) | 1,564,992 (3.12%)     | 24,580,868 (48.93%) | 24,564,353 (48.90%) |
| A6          | Colletotrichum F12C | 48             | 47,741,886  | 44.40%     | 95.39%    | 44,969,182 (94.19%) | 43,262,394 (90.62%) | 1,706,788 (3.58%)     | 23,519,143 (49.26%) | 23,524,327 (49.27%) |
| A7          | Colletotrichum F12C | 48             | 47,706,772  | 44.31%     | 96.13%    | 45,122,040 (94.58%) | 43,600,790 (91.39%) | 1,521,250 (3.19%)     | 23,494,459 (49.25%) | 23,506,823 (49.27%) |
| A8          | Colletotrichum F12C | 48             | 47,556,438  | 44.41%     | 95.59%    | 44,487,428 (93.55%) | 42,983,400 (90.38%) | 1,504,028 (3.16%)     | 23,189,308 (48.76%) | 23,166,620 (48.71%) |
| A9          | Alternaria F12A     | 48             | 50,983,214  | 44.27%     | 95.57%    | 47,747,897 (93.65%) | 46,059,963 (90.34%) | 1,687,934 (3.31%)     | 24,948,760 (48.94%) | 24,900,878 (48.84%) |
| A10         | Alternaria F12A     | 48             | 47,136,454  | 44.08%     | 95.85%    | 44,482,707 (94.37%) | 43,054,835 (91.34%) | 1,427,872 (3.03%)     | 23,158,288 (49.13%) | 23,109,482 (49.03%) |
| A11         | Alternaria F12A     | 48             | 47,940,984  | 43.92%     | 95.22%    | 44,649,014 (93.13%) | 43,322,337 (90.37%) | 1,326,677 (2.77%)     | 23,177,641 (48.35%) | 23,134,627 (48.26%) |
| A12         | Alternaria F12A     | 48             | 47,989,314  | 44.41%     | 95.76%    | 44,323,731 (92.36%) | 42,854,440 (89.30%) | 1,469,291 (3.06%)     | 23,082,526 (48.10%) | 23,068,007 (48.07%) |
| B1          | PDA disc            | 72             | 48,144,656  | 44.01%     | 95.44%    | 45,237,033 (93.96%) | 43,949,642 (91.29%) | 1,287,391 (2.67%)     | 23,404,761 (48.61%) | 23,412,504 (48.63%) |
| B2          | PDA disc            | 72             | 49,184,682  | 44.21%     | 95.43%    | 46,488,064 (94.52%) | 45,212,150 (91.92%) | 1,275,914 (2.59%)     | 24,045,637 (48.89%) | 24,034,737 (48.87%) |
| B3          | PDA disc            | 72             | 48,292,000  | 44.32%     | 95.61%    | 45,410,408 (94.03%) | 43,827,829 (90.76%) | 1,582,579 (3.28%)     | 23,674,137 (49.02%) | 23,697,209 (49.07%) |
| B4          | PDA disc            | 72             | 52,198,076  | 44.08%     | 94.56%    | 48,466,686 (92.85%) | 47,009,502 (90.06%) | 1,457,184 (2.79%)     | 25,127,902 (48.14%) | 25,124,807 (48.13%) |
| B5          | Colletotrichum F12C | 72             | 50,480,064  | 44.17%     | 95.51%    | 47,200,364 (93.50%) | 45,792,766 (90.71%) | 1,407,598 (2.79%)     | 24,476,488 (48.49%) | 24,450,922 (48.44%) |
| B6          | Colletotrichum F12C | 72             | 47,609,200  | 44.43%     | 95.76%    | 43,655,478 (91.70%) | 42,307,645 (88.86%) | 1,347,833 (2.83%)     | 22,653,657 (47.58%) | 22,644,278 (47.56%) |
| B7          | Colletotrichum F12C | 72             | 49,021,102  | 44.26%     | 95.49%    | 46,120,564 (94.08%) | 44,280,946 (90.33%) | 1,839,618 (3.75%)     | 24,181,416 (49.33%) | 24,203,810 (49.37%) |
| B8          | Colletotrichum F12C | 72             | 48,493,636  | 44.09%     | 95.51%    | 45,466,801 (93.76%) | 43,825,392 (90.37%) | 1,641,409 (3.38%)     | 23,755,822 (48.99%) | 23,767,508 (49.01%) |
| B9          | Alternaria F12A     | 72             | 48,861,856  | 44.18%     | 95.12%    | 45,981,482 (94.11%) | 44,361,521 (90.79%) | 1,619,961 (3.32%)     | 23,988,495 (49.09%) | 23,968,695 (49.05%) |
| B10         | Alternaria F12A     | 72             | 50,702,244  | 43.81%     | 95.78%    | 47,609,534 (93.90%) | 46,158,885 (91.04%) | 1,450,649 (2.86%)     | 24,710,592 (48.74%) | 24,669,302 (48.66%) |
| B11         | Alternaria F12A     | 72             | 55,608,346  | 44.17%     | 95.67%    | 52,262,814 (93.98%) | 50,544,061 (90.89%) | 1,718,753 (3.09%)     | 27,197,794 (48.91%) | 27,173,579 (48.87%) |

|     |                 |    |            |        |        |                     |                     |                   |                     |                     |
|-----|-----------------|----|------------|--------|--------|---------------------|---------------------|-------------------|---------------------|---------------------|
| B12 | Alternaria F12A | 72 | 56,462,636 | 43.91% | 95.62% | 51,029,819 (90.38%) | 49,443,897 (87.57%) | 1,585,922 (2.81%) | 26,511,823 (46.95%) | 26,469,627 (46.88%) |
|-----|-----------------|----|------------|--------|--------|---------------------|---------------------|-------------------|---------------------|---------------------|

'+', the DNA sense chain; '-', the DNA antisense chain.
